# Supplementary material for: Characteristics and outcomes of SARS-CoV-2 breakthrough infections among double-vaccinated and triple-vaccinated patients with inflammatory rheumatic diseases
Source: PubMed Central journal article supplement — RMD Open. 2023 Apr 17;9(2):e002998. doi: 10.1136/rmdopen-2023-002998 (PMC10111193; doi:10.1136/rmdopen-2023-002998), 2023-04-17
Supplement: rmdopen-2023-002998supp001.pdf [file rmdopen-2023-002998supp001.pdf]

Supplement Table 1: Patient characteristics in UV, DV, TV, QT

|                                                                              | unvaccinated (reference) |      | Double-vaccinated |      | Triple-vaccinated |      | Quadruple-vaccinated |              |
|------------------------------------------------------------------------------|--------------------------|------|-------------------|------|-------------------|------|----------------------|--------------|
|                                                                              | n                        | %    | n                 | %    | n                 | %    | n                    | %            |
|                                                                              | 923                      |      | 551               |      | 803               |      | 37                   |              |
| Age (years, median, range)                                                   | 55 (18-93)               |      | 55 (20-93)        |      | 56 (16-93)        |      | 61 (32-87)           |              |
| Female                                                                       | 603                      | 65.3 | 356               | 64.6 | 576               | 71.7 | 24                   | 64.9         |
| Body-mass-index (median, range)                                              | 26.5 (16-53)             |      | 26.7 (17-55)      |      | 25.8 (16-53)      |      | 25.4 (17-39)         | <sup>s</sup> |
| 1. Vaccine                                                                   |                          |      |                   |      |                   |      |                      |              |
| - Moderna                                                                    |                          |      | 29                | 5.3  | 56                | 7.0  | 0                    | 0            |
| - Biontech/Pfizer                                                            |                          |      | 426               | 77.3 | 573               | 71.4 | 31                   | 83.8         |
| - AstraZeneca                                                                |                          |      | 56                | 10.2 | 139               | 17.3 | 5                    | 13.5         |
| - Janssen/J& J.                                                              |                          |      | 17                | 3.1  | 4                 | 0.5  | 0                    | 0            |
| - Nuvaxovid                                                                  |                          |      | 1                 | 0.2  | 5                 | 0.6  | 0                    | 0            |
| - unknown                                                                    |                          |      | 22                | 4.0  | 26                | 3.2  | 1                    | 2.7          |
| 2. Vaccine                                                                   |                          |      |                   |      |                   |      |                      |              |
| - Moderna                                                                    |                          |      | 40                | 7.3  | 66                | 8.2  | 0                    | 0            |
| - Biontech/Pfizer                                                            |                          |      | 459               | 83.3 | 644               | 80.2 | 35                   | 94.6         |
| - AstraZeneca                                                                |                          |      | 36                | 6.5  | 60                | 7.5  | 1                    | 2.7          |
| - Janssen/J& J.                                                              |                          |      | 1                 | 0.2  | 0                 | 0    | 0                    | 0            |
| - Nuvaxovid                                                                  |                          |      | 1                 | 0.2  | 7                 | 0.9  | 0                    | 0            |
| - unknown                                                                    |                          |      | 14                | 2.5  | 26                | 3.2  | 1                    | 2.7          |
| 3. Vaccine                                                                   |                          |      |                   |      |                   |      |                      |              |
| - Moderna                                                                    |                          |      |                   |      | 201               | 25.0 | 3                    | 8.1          |
| - Biontech/Pfizer                                                            |                          |      |                   |      | 573               | 71.4 | 31                   | 83.8         |
| - AstraZeneca                                                                |                          |      |                   |      | 3                 | 0.4  | 1                    | 2.7          |
| - Janssen/J& J.                                                              |                          |      |                   |      | 2                 | 0.2  | 1                    | 2.7          |
| - Nuvaxovid                                                                  |                          |      |                   |      | 0                 | 0    | 0                    | 0            |
| - unknown                                                                    |                          |      |                   |      | 24                | 3.0  | 1                    | 2.7          |
| 4. Vaccine                                                                   |                          |      |                   |      |                   |      |                      |              |
| - Moderna                                                                    |                          |      |                   |      |                   |      | 14                   | 36.8         |
| - Biontech/Pfizer                                                            |                          |      |                   |      |                   |      | 22                   | 59.5         |
| - AstraZeneca                                                                |                          |      |                   |      |                   |      | 0                    | 0            |
| - Janssen/J& J.                                                              |                          |      |                   |      |                   |      | 0                    | 0            |
| - Nuvaxovid                                                                  |                          |      |                   |      |                   |      | 0                    | 0            |
| - unknown                                                                    |                          |      |                   |      |                   |      | 1                    | 2.7          |
| Time between SARS-CoV-2 infection and last vaccination (days, median, range) |                          |      | 151 (14-347)      |      | 88 (14-270)       |      | 35 (14-179)          |              |
| <b>IRD (multiple selection possible)</b>                                     |                          |      |                   |      |                   |      |                      |              |
| Rheumatoid arthritis                                                         | 393                      | 42.6 | 240               | 43.6 | 331               | 41.2 | 14                   | 37.8         |
| Spondyloarthritis                                                            | 278                      | 30.2 | 161               | 29.4 | 252               | 31.4 | 11                   | 29.7         |
| Connective tissue diseases                                                   | 132                      | 14.3 | 74                | 13.4 | 116               | 14.2 | 9                    | 24.3         |
| Other Vasculitis                                                             | 60                       | 6.5  | 28                | 5.1  | 45                | 5.6  | 2                    | 5.4          |
| ANCA-associated Vasculitis                                                   | 25                       | 2.7  | 19                | 3.4  | 20                | 2.5  | 1                    | 2.7          |
| Other type of IRD                                                            | 93                       | 10.1 | 51                | 9.3  | 74                | 9.2  | 3                    | 8.1          |
| <b>Immunomodulation (multiple selection possible)</b>                        |                          |      |                   |      |                   |      |                      |              |
| Glucocorticoids                                                              | 247                      | 26.8 | 134               | 24.3 | 194               | 24.2 | 8                    | 21.6         |
| Prednisolone ≤ 5 mg/day                                                      | 169                      |      | 83                |      | 121               |      | 7                    |              |
| Prednisolone 6-9 mg/day                                                      | 10                       |      | 5                 |      | 7                 |      | /                    |              |
| Prednisolone ≥ 10 mg/day                                                     | 33                       |      | 18                |      | 26                |      | 0                    |              |
| Methotrexate, leflunomide, sulfasalazine                                     | 461                      | 49.9 | 258               | 46.8 | 366               | 45.6 | 17                   | 45.9         |
| Azathioprine                                                                 | 22                       | 2.4  | 16                | 2.9  | 28                | 3.5  | 1                    | 2.8          |
| Tumor-necrosis-inhibitors (adalimumab, certolizumab, infliximab, golimumab)  | 192                      | 20.8 | 125               | 22.7 | 197               | 24.5 | 10                   | 27.0         |
| Other cytokine-inhibitors (IL-6/IL-1/IL12/23/IL17 inhibition)                | 81                       | 8.8  | 68                | 12.3 | 79                | 9.8  | 6                    | 16.2         |
| Janus kinase inhibitors (baricitinib, tofacitinib, upadacitinib, filgotinib) | 70                       | 7.6  | 51                | 9.3  | 71                | 8.8  | 4                    | 10.8         |
| Immunosuppressives (cyclosporine, mycophenolate, cyclophosphamide)           | 28                       | 3.0  | 14                | 2.5  | 20                | 2.5  | 6                    | 16.2         |
| Abatacept                                                                    | 10                       | 1.1  | 8                 | 1.5  | 10                | 1.2  | 1                    | 2.7          |
| Rituximab                                                                    | 28                       | 3.0  | 24                | 4.4  | 35                | 4.4  | 1                    | 2.7          |
| Belimumab                                                                    | 8                        | 0.9  | 7                 | 1.3  | 7                 | 0.9  | 0                    | 0            |
| Immunoglobulines                                                             | 3                        | 0.3  | 1                 | 0.2  | 7                 | 0.9  | 0                    | 0            |
| Apremilast                                                                   | 4                        | 0.4  | 2                 | 0.4  | 3                 | 0.4  | 0                    | 0            |
| Other immunomodulators                                                       | 51                       | 5.5  | 18                | 3.3  | 29                | 3.6  | 3                    | 8.1          |
| No immunomodulation                                                          | 100                      | 10.8 | 44                | 8.0  | 57                | 7.1  | 2                    | 5.4          |
| <b>Disease activity</b>                                                      |                          |      |                   |      |                   |      |                      |              |
| No/low                                                                       | 780                      | 84.5 | 478               | 86.8 | 710               | 88.4 | 35                   | 94.6         |
| Moderate/high                                                                | 129                      | 14.0 | 65                | 11.8 | 78                | 9.7  | 2                    | 5.4          |
| <b>Comorbidities (multiple selections possible)</b>                          |                          |      |                   |      |                   |      |                      |              |
| Arterial hypertension                                                        | 287                      | 31.1 | 172               | 31.2 | 229               | 28.5 | 12                   | 32.4         |
| Other relevant comorbidities                                                 | 168                      | 18.2 | 110               | 20.0 | 130               | 16.2 | 9                    | 24.3         |
| Heart failure/arrhythmia                                                     | 93                       | 10.1 | 67                | 12.2 | 68                | 8.5  | 6                    | 16.2         |
| Diabetes mellitus                                                            | 83                       | 9.0  | 50                | 9.1  | 47                | 5.9  | 2                    | 5.4          |
| Osteoporosis                                                                 | 52                       | 5.6  | 35                | 6.4  | 74                | 9.2  | 3                    | 8.1          |
| Chronic renal failure                                                        | 47                       | 5.1  | 29                | 5.3  | 48                | 6.0  | 6                    | 16.2         |
| Cancer/history of cancer                                                     | 26                       | 2.8  | 19                | 3.4  | 22                | 2.7  | 1                    | 2.7          |
| Chronic obstructive lung diseases                                            | 22                       | 2.4  | 12                | 2.2  | 24                | 3.0  | 0                    | 0            |
| Interstitial lung diseases                                                   | 23                       | 2.5  | 12                | 2.2  | 18                | 2.2  | 4                    | 10.8         |
| Bronchial asthma                                                             | 39                       | 4.2  | 27                | 4.9  | 42                | 5.2  | 1                    | 2.7          |
| Pregnancy                                                                    | 9                        | 1.0  | 4                 | 0.7  | 2                 | 0.2  | 0                    | 0            |
| Pulmonary hypertension                                                       | 7                        | 0.8  | 2                 | 0.4  | 2                 | 0.2  | 2                    | 5.4          |
| Liver cirrhosis                                                              | 4                        | 0.4  | 1                 | 0.2  | 3                 | 0.4  | 0                    | 0            |
| Absence of relevant comorbidities                                            | 350                      | 37.9 | 250               | 45.4 | 371               | 46.2 | 9                    | 24.3         |
| <b>COVID-19 associated complications</b>                                     |                          |      |                   |      |                   |      |                      |              |
| Hospitalisation                                                              | 142                      | 15.4 | 44                | 8.0  | 22                | 2.7  | 1                    | 2.7          |
| Invasive ventilation                                                         | 25                       | 2.7  | 11                | 2.0  | 1                 | 0.1  | 0                    | 0            |
| Relevant complications (e.g. concomitant infection, thromboembolic events)   | 57                       | 6.2  | 23                | 4.2  | 6                 | 0.7  | 0                    | 0            |
| COVID-19 related death                                                       | 18                       | 2.0  | 10                | 1.8  | 5                 | 0.6  | 0                    | 0            |
